1 Running title: new genetic variants associated with mathematical ability in Chinese  
2 children

3

4 **A genome-wide association study identified new variants associated with**  
5 **mathematical abilities in Chinese children**

6

7 Liming Zhang MA<sup>1</sup>, Zhengjun Wang PhD<sup>1</sup>, Zijian Zhu PhD<sup>1</sup>, Qing Yang MS<sup>1</sup>, Chen  
8 Cheng MS<sup>1</sup>, Shunan Zhao MS<sup>1</sup>, Chunyu Liu PhD<sup>1,2,\*</sup>, Jingjing Zhao PhD<sup>1,\*</sup>

9

10 <sup>1</sup> School of Psychology, Shaanxi Normal University, and Shaanxi Provincial Key  
11 Research Center of Child Mental and Behavioral Health, Xi'an, China

12 <sup>2</sup>Department of Psychiatry, SUNY Upstate Medical University, Syracuse, NY, USA

13

14 \* co-corresponding author

15

16

17

18

19 Address Correspondence to:

20 Jingjing Zhao, 199 South Chang'an Road, Xi'an, China, 710062, Phone/Fax: + 86 29

21 85303236. Email address: [jingjing.zhao@snnu.edu.cn](mailto:jingjing.zhao@snnu.edu.cn).

22

23

## Abstract

24 Mathematical ability is moderately heritable, and it is a complex trait which can be  
25 evaluated in several different categories. A few genetic studies have been published on  
26 general mathematical ability. However, no genetic study focused on specific  
27 mathematical ability categories. In this study, we separately performed genome-wide  
28 association studies (GWASs) on 11 mathematical ability categories in 1 146 students  
29 from Chinese elementary schools. We identified 7 genome-wide significant single  
30 nucleotide polymorphisms (SNPs) with strong linkage disequilibrium (LD) among  
31 each other (all  $r^2 > 0.8$ ) associated with mathematical reasoning ability (top SNP:  
32 rs34034296,  $p = 2.01 \times 10^{-8}$ , nearest gene: CUB and Sushi multiple domains 3, CSMD3).  
33 We replicated one SNP (rs133885) from 585 SNPs previously reported to be  
34 associated with general mathematical ability associated with division ability in our  
35 data ( $p = 1.053 \times 10^{-5}$ ). In the gene- and gene-set enrichment analysis by MAGMA, we  
36 found three significant enrichments of associations with three mathematical ability  
37 categories for three genes. We also observed four significant enrichments of  
38 associations with four mathematical ability categories for three gene sets. Our results  
39 suggest new candidate genetic loci for the genetics of mathematical ability.

40

## 41 KEYWORDS

42 Genome-wide association study, quantitative trait, mathematical ability, enrichment

## 43 INTRODUCTION

44 Mathematical ability is a complex trait which is the key to excellent performance  
45 in study and work. Substantial heritability estimates (0.2-0.9) have been reported in  
46 previous studies indicating that mathematical ability was influenced by genetic  
47 factors[1-5]. In recent years, several GWASs have been applied to study genetic  
48 components associated with mathematical ability [6-11]. Among these GWASs,  
49 rs133885 was considered to be associated with mathematical ability ( $n=699$ ,  
50  $p=7.71\times 10^{-10}$ ) [11], but the finding was not replicated in another study [12]. Then,  
51 researchers found four loci associated with Chinese students' curriculum scores of  
52 mathematics by conducting a meta-analysis [7]. Later, Lee and colleagues performed  
53 a GWAS on two phenotypes reflecting mathematical ability in large samples ( $n_1=564$   
54  $698$ ,  $n_2=430$   $445$ ), they found a total of 983 loci at genome-wide significant level [10].

55 According to the Syllabus of Primary and Secondary Schools in China,  
56 mathematical ability can be divided into specific categories such as calculation ability  
57 (addition, subtraction, multiplication, division, etc.), logical reasoning ability, spatial  
58 ability and applied mathematics ability. According to UK National Curriculum (NC)  
59 Key Stage 2 criteria, the mathematical knowledge evaluated by the examination  
60 include number (number and position value, addition, subtraction, multiplication,  
61 division, etc.), measurement, geometry (properties of shapes, position and direction)  
62 and statistics. These mathematical ability categories are usually measured by some  
63 specific scales. The Heidelberg mathematics test is a well-established test with good  
64 reliability and validity, which considered to be one of the most comprehensive tests to  
65 measure different mathematical ability categories [13].

66 Previous GWASs mostly used composite scores as phenotypes (self-reported  
67 math ability, NC-based teacher ratings, NC-based web-based testing, academic

68 achievement, etc.), except for one study, which used test measurement (numerosity  
69 judgements), a composite score of two tests (addition and multiplication) and a  
70 composite score of three tests (addition, multiplication and numerosity judgements) as  
71 three phenotypes, respectively [11]. To our knowledge, no researchers have  
72 systematically used a wide range of mathematical tests, the detailed subphenotypes  
73 such as those in Heidelberg mathematics test, to screen for genetic associations. In  
74 addition, none of past large scale genetic association studies of mathematical abilities  
75 have used asian populations.

76 In the present study, we performed a GWAS in students of the Chinese  
77 elementary school to discover the genetic basis of mathematical ability measured by  
78 Heidelberg mathematics test [13]. We separately analyzed eleven mathematical ability  
79 categories. Then, we also tested 585 SNPs that have been reported to be associated  
80 with general mathematical ability in our data for the eleven categories. Finally, we  
81 found some significant enrichment of associations with categories for specific genes  
82 or gene sets.

## 83 **METHODS AND MATERIALS**

### 84 **Participants**

85 A cohort of primary school students from two provinces in the northwestern part  
86 of China, including Shaanxi province and Gansu province, were recruited as  
87 participants in this study. Nonverbal intelligences of these children were measured by  
88 Raven's Standard Progressive Matrices individually [14]. According to Zhang's local  
89 norms [15], all children had normal IQ. In total, 1 182 participants were eligible for  
90 subsequent genotyping and association analysis. This study was approved by the  
91 ethics committee of Shaanxi Normal University, and written informed consent was  
92 obtained for all the participants' parents.

93 **Phenotypic measure**

94 A Chinese version of Heidelberg mathematics test was used to test the  
95 mathematical ability for the Chinese cohort [13-16]. The test included 11 subtests  
96 corresponding to 11 mathematical ability categories divided into two areas, namely  
97 the arithmetic operations area and the numerical-logical and spatial-visual skills area.  
98 Area of arithmetic operations assess performance in six tasks, including addition,  
99 subtraction, multiplication, division, equation and magnitude perception tasks. Area of  
100 numeric-logical and spatial-visual evaluate performances in five tasks, including  
101 mathematical reasoning, visual size estimation, spatial conception, quantity counting  
102 and visuomotor tasks. A brief description of this test is shown in Table S1.

103 The test-retest reliabilities of the whole test and the area tests were  $r = .69-.89$   
104 and  $r = .87-.93$ , respectively [13]. Later investigations revealed that correlations  
105 between whole test score and mathematical curriculum scores were  $r = .67$  and  $r = .68$   
106 respectively in two different samples [17]. The split-half reliability of the Chinese  
107 version of Heidelberg mathematics test was 0.9 and the test score was also correlated  
108 with Chinese students' curriculum scores of mathematics [16].

109 Students were tested in groups. Each subtest was required to complete in a given  
110 amount of time. Testing process of this test is shown in the supplementary methods.  
111 All analyses were based on the raw data.

112 Scores of subtests showed moderate to high degree of correlations with each  
113 other (see Table S2).

114 **Genotype quality control and imputation**

115 Genomic DNAs were extracted from saliva samples by Hi-Swab DNA Kit  
116 (Lot#R7220, Cat.#DP362-02) of Tiangen Biotechnology in Beijing, China.  
117 Genome-wide genotyping experiments used Illumina Asian screening array (650K)

118 supplied by Compass Biotechnology in Beijing, China. There were 1 177 samples and  
119 704 415 SNPs in the original data. Genotype quality control was conducted in PLINK  
120 v1.90. SNPs were removed if they displayed a Hardy-Weinberg Equilibrium (HWE)  
121  $<10^{-5}$ , a minor allele frequency (MAF)  $<0.01$ , or a variant call rate  $<0.95$ . Individuals  
122 were removed if they displayed a sex discrepancy between the records and the  
123 genetically inferred data [18, 19], an unexpected duplicates or probable relatives  
124 (PI-HAT $>0.20$ ), or a genotyping call rate  $<0.9$ . After this step of quality control, 1 146  
125 samples and 497 823 SNPs were left.

126 Imputation was conducted using the Genome Asia Pilot-GasP (GRCh37/hg19)  
127 reference panel on the Michigan Imputation Server (Minimac4). After imputation,  
128 there were 8 625 058 SNPs. Imputed SNPs were removed if they showed a  $R^2 <0.6$ .  
129 After the imputation, we carried out a quality control again. SNPs were removed if  
130 they displayed a HWE  $<10^{-5}$ , a MAF  $<0.05$ , or a variant call rate  $<0.95$ . Individuals  
131 were removed if they displayed a genotyping call rate  $<0.9$ . Finally, there were 5 406  
132 859 SNPs and 1 146 samples left.

### 133 **Statistical analysis**

134 After imputation and quality control, 1 146 individuals had genotype data,  
135 covariate data and phenotype data simultaneously (age:  $115.25 \pm 9.59$  months; sex  
136 ratio(M:F): 588:558) (Table S3 for sample size of each continuous trait analysed in  
137 this study).

138 We conducted GWASs with genotype dosage using PLINK v1.90. Linear  
139 regression analyses for 11 mathematical ability categories were carried out by an  
140 additive model using quadratic term for age, sex, school and the first five principal  
141 components of population structure as covariates [19]. Population structure analysis  
142 was conducted by PLINK v1.90 and GCTA. To perform this analysis, we used options

143 of –autosome, make-grm, grm and pca in the GCTA. Quantile-quantile plots were  
144 generated by package qq-man (R3.5) to reveal the consistency between the observed  
145 and expected  $P$  value and the rationality of analysis model. Manhattan plots were  
146 generated by package qq-man (R3.5) to present the result of GWAS. Genome-wide  
147 significance was defined as common threshold ( $p=5\times 10^{-8}$ ). Since the 11 phenotypes  
148 are highly correlated, we did not correct for the number of phenotypes tested.  
149 Regional association plots were generated by a web-based tool LocusZoom  
150 (<http://locuszoom.org/>) to reveal regional visualizations around top SNPs. Analysis  
151 was performed on autosomes and unrelated individuals only. We also examined the  
152 impact of identified significant loci on other phenotypes.

### 153 **Assessment of SNPs previously associated with mathematical ability**

154 To date, a total of 988 genome-wide significant ( $p<5\times 10^{-8}$ ) SNPs have been  
155 reported by previous publications. One of these SNPs (rs133885) associated with a  
156 composite score (addition, multiplication and numerosity judgements) was discovered  
157 in German-Austrian dyslexia samples ( $p=7.71\times 10^{-10}$ ,  $n=699$ ) and replicated in a  
158 sample representing the general population ( $p=0.048$ ,  $n=1\ 080$ ) [11]. Four of these  
159 SNPs associated with Chinese students' curriculum scores of mathematics were  
160 reported from a study of meta-analysis of results in three different cohorts, and these  
161 four SNPs have strong linkage disequilibrium [7]. The other 983 SNPs, of which 618  
162 SNPs associated with self-reported math ability ( $n=564\ 698$ ) and 365 SNPs associated  
163 with highest math class taken ( $n=430\ 445$ ), were identified in samples from 23andMe,  
164 and all these SNPs are independent [10]. We looked up these SNPs in our data,  
165 mapped 585 SNPs, and checked whether they were associated with mathematical  
166 ability categories measured in Chinese children. Here we used a loose criterion  $p =$   
167  $0.05/585$  for significant replication. Details of these SNPs can be found in Table S4.

## 168 **Gene- and gene set-based enrichment tests**

169 Gene- and gene-set-based enrichment analyses for the mathematical ability  
170 categories were performed by MAGMA [20]. The gene analysis was based on our raw  
171 GWAS data. First of all, SNPs were allocated on the protein-coding genes according  
172 to their genomic location. These genes containing at least one SNP of our data were  
173 then subjected to internal quality control. Finally, the filtered genes were tested in the  
174 gene-based enrichment analysis. Given the number of genes (17 734) finally tested,  
175 the Bonferroni-corrected significance level for this analysis was set to  $2.82 \times 10^{-6}$   
176 ( $p=0.05/17\ 734$ ).

177 The gene-set analysis used a competitive gene-set analysis in MAGMA based on  
178 the result of gene analysis [21]. Original gene sets are from C2 data set (including  
179 Chemical and genetic perturbations, Canonical pathways) on the Gene Set  
180 Enrichment Analysis. We tested a total of 5 497 gene sets containing genes defined in  
181 the genotype data. Given the number of gene sets finally analyzed, the  
182 Bonferroni-corrected significance level for this analysis was set to  $9.10 \times 10^{-6}$   
183 ( $p=0.05/5\ 497$ ).

## 184 **RESULTS**

### 185 **Single-variant genome-wide associations**

186 We separately analyzed eleven mathematical ability categories in this study.  
187 Mathematical reasoning ability showed genome-wide significant associations with  
188 seven SNPs, the most significant SNP we identified is rs34034296 ( $p=2.01 \times 10^{-8}$ ,  
189  $MAF=0.185$ ). Because the seven SNPs were in high LD with each other (all  $r^2 > 0.8$ ),  
190 indeed we only had one independent hit associated with this trait (we report the most  
191 significant one). All these SNPs mapped to an intergenic region with the nearest gene  
192 CSMD3 about 400 kb away from them.



193 Spatial conception ability showed a nominally genome-wide significant  
194 association with rs1369404 ( $p=5.40\times 10^{-8}$ ,  $MAF=0.062$ ).

195 Manhattan plots for mathematical reasoning and spatial conception abilities are  
196 revealed in Figure 1 and 2. Regional association plots with these two categories are  
197 revealed in Figure 3 and 4. More details for all significant SNPs are reported in Table  
198 1. Quantile-quantile plots for all traits and Manhattan plots for other traits are reported  
199 in Supplementary Figures S1-20. Results of genome-wide association analysis of all  
200 phenotypes ( $p<10^{-5}$ ) are presented in supplementary Table S5.

201 The most significant SNP (rs34034296) also showed an association with another  
202 trait (magnitude perception) withstanding the Bonferroni correction ( $p=2.638\times 10^{-3} <$   
203  $0.05/10$ ). Detailed information of analyses of the relationship between the SNP and all  
204 other traits are reported in Table 2.

#### 205 **SNPs previously reported to be associated with general mathematical ability**

206 We replicated one genetic locus (rs133885) associated with division ability in our  
207 data ( $p=1.053\times 10^{-5}$ ) that survived Bonferroni-corrected significance level of  $8.5\times 10^{-5}$   
208 ( $p=0.05/585$ ). The risk allele is identical in these two studies.

#### 209 **Gene- and gene-set-based associations**

210 We observed a significant association for a gene LINGO2 (leucine rich repeat  
211 and Ig domain containing 2) with subtraction ability ( $Z=4.60$ ,  $p=2.08\times 10^{-6}$ ), a  
212 significant association for a gene OAS1 (2'-5'-oligoadenylate synthetase 1) with  
213 spatial conception ability ( $Z=4.62$ ,  $p=1.90\times 10^{-6}$ ), a significant association for a gene  
214 HECTD1 (HECT domain E3 ubiquitin protein ligase 1) with division ability ( $Z=4.54$ ,  
215  $p=2.80\times 10^{-6}$ ).

216 Similarly, in the gene-set-based analysis, we observed a significant association  
217 for a gene set (REACTOME\_ERYTHROPOIETIN\_ACTIVATES\_

218 PHOSPHOINOSITIDE\_3\_KINASE) with magnitude perception ability ( $p=3.50\times 10^{-7}$ ,  
219  $\beta=1.36$ ,  $SE=0.27$ ), a significant association for a gene set  
220 (DASU\_IL6\_SIGNALING\_DN) with addition ability ( $p=1.42\times 10^{-6}$ ,  $\beta=1.31$ ,  
221  $SE=0.28$ ), a significant association for a gene set (DASU\_IL6\_SIGNALING\_DN)  
222 with division ability ( $p=3.97\times 10^{-8}$ ,  $\beta=1.52$ ,  $SE=0.28$ ) and a significant association for  
223 a gene set (BIOCARTA\_P53\_PATHWAY) with spatial conception ( $p=1.88\times 10^{-6}$ ,  
224  $\beta=0.80$ ,  $SE=0.17$ ). The genes in these three gene sets are listed in Table S6a-d.

## 225 **DISCUSSION**

226 This is the first time that Heidelberg mathematics test has been used to measure  
227 phenotypes in GWAS of mathematical ability. We identified seven SNPs associated  
228 with mathematical reasoning ability. We replicated one SNP (rs133885) from the 585  
229 SNPs previously reported to be associated with general mathematical ability. We also  
230 found genes or gene sets significantly associated with addition, subtraction, division,  
231 magnitude perception and spatial conception ability in enrichment analysis.

232 The most significant variant associated with mathematical reasoning ability was  
233 rs34034296. This SNP is located in the desert region of genome. The nearest gene to  
234 this locus is CSMD3. Researchers have reported copy number variants (CNVs) of  
235 CSMD3 in patients with schizophrenia and autism [22-24]. Autism and developmental  
236 dyscalculia are neurodevelopmental disorders, and they have comorbidities [25]. We  
237 for the first time show that these genes are directly associated with mathematical  
238 ability.

239 We assessed SNPs previously associated with mathematical ability. One SNP  
240 (rs133885) associated with a composite score (addition, multiplication and numerosity  
241 judgements) was replicated in the phenotype of division ability in our data. In  
242 multiplication task, children were asked to judge whether the presented equations (e.g.

243 “ $5 \times 6 = 30$ ”) were correct. Division is the inverse of multiplication, so children may use  
244 division to test the correctness of multiplication equations. SNPs associated with  
245 self-reported math ability and highest math class taken were not replicated in any  
246 phenotype. Self-reported math ability and highest math class taken were assessed by  
247 questions, which is very different from the way we evaluated mathematical ability.  
248 Also, SNPs associated with a composite curriculum score (understanding numbers,  
249 computing and knowledge, non-numerical processes) were not replicated. Therefore,  
250 different ways and dimensions of evaluating mathematical ability may affect the  
251 replications of significant loci. Other reasons that significant loci were not replicated  
252 may be related to our relatively small sample size and ethnicity differences.

253       Among these identified genes and gene sets, there are two genes associated  
254 with cognition. LINGO2 was identified as a gene significantly associated with  
255 subtraction ability. It can regulate synapse assembly and was reported to be a risk  
256 gene for autism spectrum disorders [26]. OAS1 was identified as a gene significantly  
257 associated with spatial conception ability. It has ubiquitous expression in various  
258 tissues and was reported to be a risk gene for Alzheimer's disease [27]. Similarly,  
259 these genes and gene sets above have been identified for the first time to be associated  
260 with mathematical ability.

261       In conclusion, we identified SNPs, genes and gene sets associated with  
262 mathematical skills in a sample of Chinese children. Results of our research provide  
263 evidence that different mathematical abilities may have different genetic basis. This  
264 study not only refined the current GWAS of mathematical ability but also added some  
265 population diversity to the literature. Future studies should expand the sample size to  
266 verify our findings.

267  
268

269 **Acknowledgments**

270 The study was funded by National Natural Science Foundation of China (61807023),  
271 Humanities and Social Science Fund of Ministry of Education of the People's  
272 Republic of China (17XJC190010), Shaanxi Province Natural Science  
273 Foundation (2018JQ8015), and Fundamental Research Funds for the Central  
274 Universities (CN) (GK201702011) to Jingjing Zhao. This study was also supported by  
275 internal funds from Shaanxi Normal University to Jingjing Zhao and Chunyu Liu.  
276 The authors would like to thank all children who participated in the study and their  
277 parents and teachers for their time and cooperation.

278

279 **Conflict of interest**

280 Authors declared that there was no conflict of interest.

281

282 **SUPPORTING INFORMATION**

283 Additional supporting information may be found in the Supporting Information  
284 section at the end of this article at MP's website.

285

286

287

288

289

**Table 1. Seven significant genetic loci ( $p < 5 \times 10^{-8}$ ) detected in the GWAS analyses using genotype dosage**

| <i>Trait</i> | <i>SNP</i> | <i>CHR:BP</i> | <i>G/I</i> | <i>MAF</i> | <i>FRQ</i> | <i>INFO</i> | <i>BETA</i> | <i>SE</i> | <i>P</i> |
|--------------|------------|---------------|------------|------------|------------|-------------|-------------|-----------|----------|
| MR           | rs34034296 | 8:114796023   | I          | 0.1824     | 0.8174     | 0.9503      | 0.7391      | 0.1308    | 2.01e-08 |
|              | rs13273940 | 8:114795581   | G          | 0.1832     | 0.8178     | 0.9585      | 0.7311      | 0.1303    | 2.53e-08 |
|              | rs13274174 | 8:114795629   | I          | 0.1841     | 0.8164     | 0.9583      | 0.7229      | 0.13      | 3.32e-08 |
|              | rs34769141 | 8:114794087   | I          | 0.1841     | 0.816      | 0.9642      | 0.7194      | 0.1295    | 3.43e-08 |
|              | rs13273350 | 8:114795407   | I          | 0.1841     | 0.8158     | 0.9615      | 0.7194      | 0.1296    | 3.52e-08 |
|              | rs13264592 | 8:114794819   | I          | 0.1841     | 0.8151     | 0.9566      | 0.717       | 0.1297    | 4.05e-08 |
|              | rs13263837 | 8:114794308   | I          | 0.1841     | 0.8148     | 0.957       | 0.7164      | 0.1296    | 4.08e-08 |

*Note: G/I: Genotyped/Imputed; MR means mathematical reasoning ability.*

292

**Table 2. Results of pleiotropy for the significant SNP.**

| SNP                    | TRAIT <sup>2</sup>     | FRQ   | INFO  | BETA   | SE    | P        |
|------------------------|------------------------|-------|-------|--------|-------|----------|
| TRAIT <sup>1</sup>     |                        |       |       |        |       |          |
| rs34034296             |                        |       |       |        |       |          |
| mathematical reasoning | magnitude perception   | 0.818 | 0.955 | 0.906  | 0.301 | 2.64e-03 |
|                        | quantity counting      | 0.818 | 0.955 | 0.221  | 0.290 | 0.447    |
|                        | division               | 0.818 | 0.955 | 0.921  | 0.375 | 1.42e-02 |
|                        | visuomotor             | 0.818 | 0.958 | -0.819 | 2.240 | 0.714    |
|                        | multiplication         | 0.818 | 0.955 | 0.258  | 0.182 | 0.157    |
|                        | visual size estimation | 0.818 | 0.955 | 0.335  | 0.310 | 0.280    |
|                        | quantity counting      | 0.818 | 0.954 | 0.069  | 0.209 | 0.741    |
|                        | subtraction            | 0.818 | 0.956 | 0.604  | 0.271 | 2.62e-2  |
|                        | addition               | 0.818 | 0.955 | 0.575  | 0.268 | 3.21e-2  |
|                        | spatial conception     | 0.818 | 0.954 | 0.254  | 0.233 | 0.276    |

293 Note: <sup>1</sup> means original traits of the SNP, <sup>2</sup> means other traits tested in gene pleiotropy  
 294 analysis. The effects of each significant SNP on the other 10 traits were examined, so  
 295 the Bonferroni-corrected significance level for this analysis was set to 0.005  
 296 (p=0.05/10).

297

298

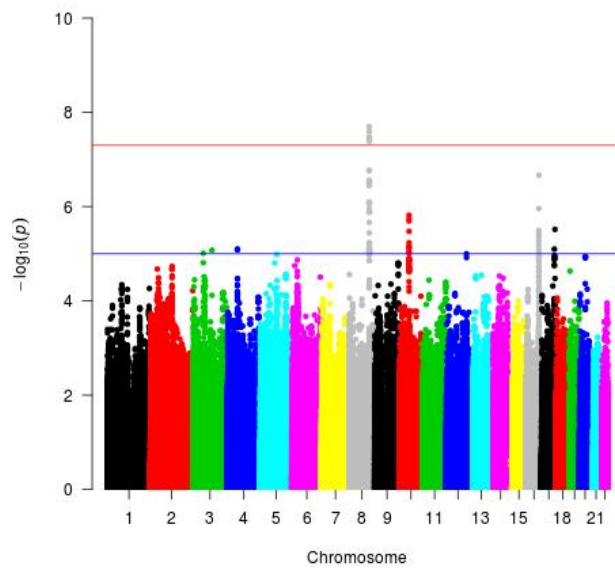

299

300

**Figure 1**

301

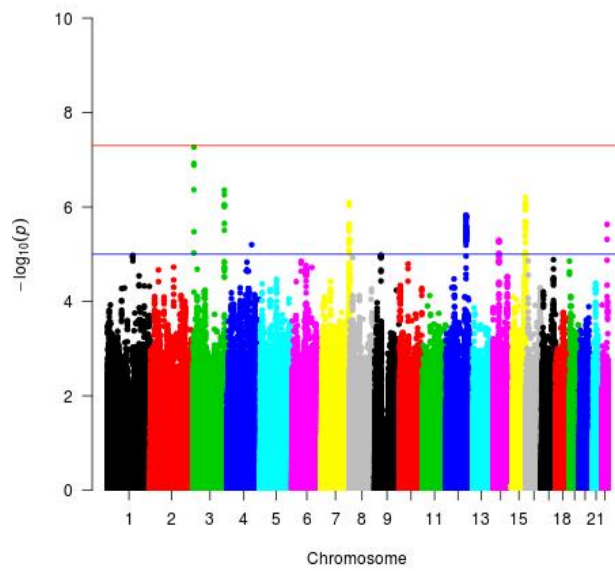

302

303

**Figure 2**

304

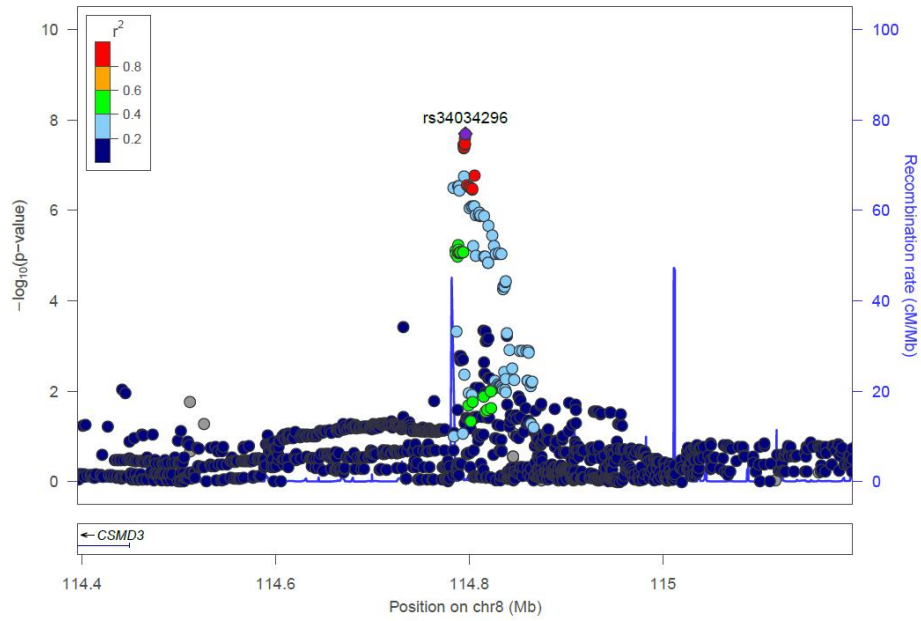

305

306

**Figure 3**

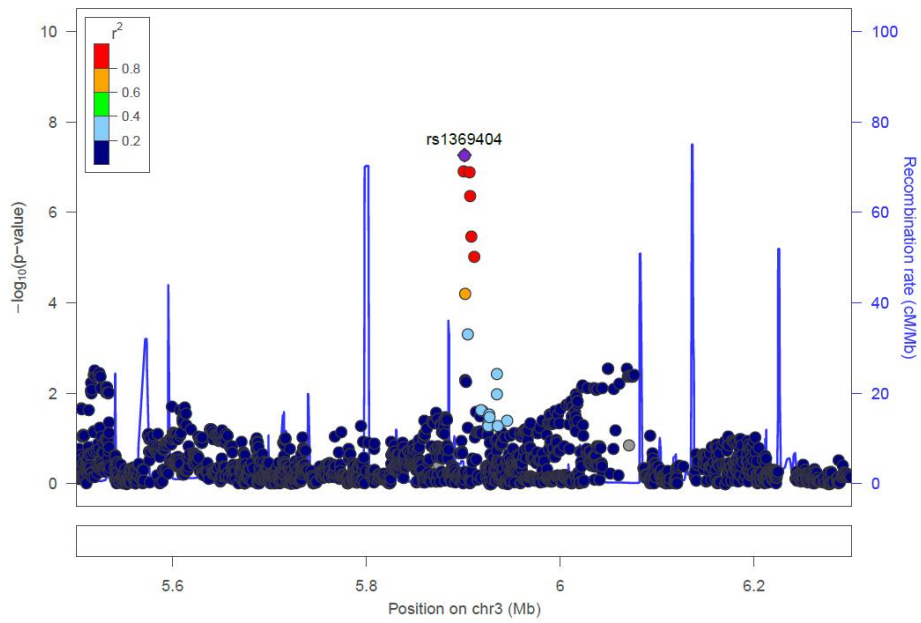

307

308

309

**Figure 4**



310 **Figure legends**

311

312 Figure 1. Manhattan plots for mathematical reasoning ability. X-axis represents the  
313 position of SNPs on each autosome, and y-axis represents the significance of  
314 association with the phenotype. The horizontal blue line represents a threshold of  
315 significance that we specified ( $1 \times 10^{-6}$ ). The horizontal red line represents the  
316 threshold for genome-wide significance ( $5 \times 10^{-8}$ ).

317

318 Figure 2. Manhattan plots for spatial conception ability. X-axis represents the position  
319 of SNPs on each autosome, and y-axis represents the significance of association with  
320 the phenotype. The horizontal blue line represents a threshold of significance that we  
321 specified ( $1 \times 10^{-6}$ ). The horizontal red line represents the threshold for genome-wide  
322 significance ( $5 \times 10^{-8}$ ).

323

324 Figure 3. Regional association plots with mathematical reasoning ability. The most  
325 significant genetic loci are highlighted in violet.  $r^2$  are the LD values between other  
326 loci and the most significant SNP.

327

328 Figure 4. Regional association plots with spatial conception. The most significant  
329 genetic loci are highlighted in violet.  $r^2$  are the LD values between other loci and the  
330 most significant SNP.

331  
332  
333  
334  
335  
336  
337  
338  
339  
340  
341  
342  
343  
344  
345  
346  
347  
348  
349  
350  
351  
352  
353  
354  
355  
356  
357  
358  
359  
360  
361  
362  
363  
364  
365

## References

1. Alarcón M, Knopik VS, DeFries JC. Covariation of mathematics achievement and general cognitive ability in twins. *J Sch Psychol.* 2000; 38: 63-77.
2. Haworth CM, Kovas Y, Harlaar N, Hayiou-Thomas ME, Petrill SA, Dale PS *et al.* Generalist genes and learning disabilities: A multivariate genetic analysis of low performance in reading, mathematics, language and general cognitive ability in a sample of 8000 12-year-old twins. *Journal of Child Psychology and Psychiatry.* 2009; 50: 1318-1325.
3. Kovas Y, Haworth CM, Petrill SA, Plomin R. Mathematical ability of 10-year-old boys and girls: genetic and environmental etiology of typical and low performance. *Journal of learning disabilities.* 2007; 40: 554-567.
4. Oliver B, Harlaar N, Hayiou Thomas ME, Kovas Y, Walker SO, Petrill SA *et al.* A Twin Study of Teacher-Reported Mathematics Performance and Low Performance in 7-Year-Olds. *J Educ Psychol.* 2004; 96: 504.
5. Wadsworth S, DeFries J, Fulker D, Plomin R. Cognitive ability and academic achievement in the Colorado Adoption Project: A multivariate genetic analysis of parent-offspring and sibling data. *Behavior Genetics.* 1995; 25: 1-15.
6. Baron-Cohen S, Murphy L, Chakrabarti B, Craig I, Mallya U, Lakatošová S *et al.* A genome wide association study of mathematical ability reveals an association at chromosome 3q29, a locus associated with autism and learning difficulties: a preliminary study. *PLoS One.* 2014; 9: e96374.
7. Chen H, Gu X-h, Zhou Y, Ge Z, Wang B, Siok WT *et al.* A genome-wide association study identifies genetic variants associated with mathematics ability. *Sci Rep.* 2017; 7: 1-9.
8. Davis OS, Band G, Pirinen M, Haworth CM, Meaburn EL, Kovas Y *et al.* The correlation between reading and mathematics ability at age twelve has a substantial genetic component. *Nature Communications.* 2014; 5: 1-6.
9. Docherty SJ, Davis OS, Kovas Y, Meaburn EL, Dale PS, Petrill SA *et al.* A genome-wide association study identifies multiple loci associated with mathematics ability and disability. *Genes Brain Behav.* 2010; 9: 234-247.
10. Lee JJ, Wedow R, Okbay A, Kong E, Maghziyan O, Zacher M *et al.* Gene discovery and polygenic prediction from a genome-wide association study of educational attainment in 1.1 million individuals. *Nat Genet.* 2018; 50: 1112-1121.
11. Ludwig K, Sämman P, Alexander M, Becker J, Bruder J, Moll K *et al.* A common variant in myosin-18B contributes to mathematical abilities in children with dyslexia and intraparietal sulcus variability in adults. *Translational psychiatry.* 2013; 3: e229-e229.
12. Pettigrew KA, Fajutrao Valles SF, Moll K, Northstone K, Ring S, Pennell C *et al.* Lack of replication for the myosin-18B association with mathematical ability in

- 366 independent cohorts. *Genes, Brain and Behav.* 2015; 14: 369-376.
- 367
- 368 13. Haffner J. *HRT 1-4: Heidelberger Rechentest; Erfassung mathematischer Basiskompetenzen im Grundschulalter.* Hogrefe2005.
- 369
- 370 14. Raven JC CJ, Raven J. *Standard progressive matrices.* Oxford Psychologists Press: Oxford, England, 1996.
- 371
- 372 15. Zhang H, Wang X. 瑞文标准推理测验手册 [Raven's IQ Reasoning Standardized Test]. Beijing: Department of Psychology, Beijing Normal University Press1985.
- 373
- 374 16. Li L. Study on the Developmental Level of Pupil's Basic Mathematical Abilities. 2005.
- 375
- 376 17. Görlitz D, Roick T, Hasselhorn M. DEMAT 4+. Deutscher Mathematiktest für vierte Klassen. Göttingen: Hogrefe2006.
- 377
- 378 18. Anderson CA, Pettersson FH, Clarke GM, Cardon LR, Morris AP, Zondervan KT. Data quality control in genetic case-control association studies. *Nat Protoc.* 2010;
- 379 5: 1564-1573.
- 380
- 381 19. Chang CC, Chow CC, Tellier LC, Vattikuti S, Purcell SM, Lee JJ. Second-generation PLINK: rising to the challenge of larger and richer datasets. *Gigascience.* 2015;
- 382 4: s13742-13015-10047-13748.
- 383
- 384 20. de Leeuw CA, Mooij JM, Heskes T, Posthuma D. MAGMA: generalized gene-set analysis of GWAS data. *PLoS Comput Biol.* 2015; 11: e1004219.
- 385
- 386 21. Gerring ZF, Mina-Vargas A, Derks EM. eMAGMA: An eQTL-informed method to identify risk genes using genome-wide association study summary statistics. *bioRxiv.* 2019: 854315.
- 387
- 388
- 389 22. Curran S, Ahn JW, Grayton H, Collier DA, Ogilvie CM. NRXN1 deletions identified by array comparative genome hybridisation in a clinical case series - further understanding of the relevance of NRXN1 to neurodevelopmental disorders. *Journal of molecular psychiatry.* 2013; 1: 4-4.
- 390
- 391
- 392 23. Malhotra D, McCarthy S, Michaelson JJ, Vacic V, Burdick KE, Yoon S *et al.* High frequencies of de novo CNVs in bipolar disorder and schizophrenia. *Neuron.* 2011;
- 393 72: 951-963.
- 394
- 395 24. Magri C, Sacchetti E, Traversa M, Valsecchi P, Gardella R, Bonvicini C *et al.* New copy number variations in schizophrenia. *PLoS One.* 2010; 5: e13422.
- 396
- 397 25. Morsanyi K, van Bers BMCW, McCormack T, McGourty J. The prevalence of specific learning disorder in mathematics and comorbidity with other developmental disorders in primary school-age children. *British Journal of Psychology.* 2018; 109: 917-940.
- 398
- 399
- 400 26. Gazzellone MJ, Zhou X, Lionel AC, Uddin M, Thiruvahindrapuram B, Liang S *et al.* Copy number variation in Han Chinese individuals with autism spectrum

401 disorder. *J Neurodev Disord.* 2014; 6: 34.

402

403 27. Salih DA, Bayram S, Guelfi S, Reynolds RH, Shoai M, Rytén M *et al.* Genetic variability in response to amyloid beta deposition influences Alzheimer's disease risk.

404 *Brain Commun.* 2019; 1: fcz022.

405

406

407

408

409

410
